# Supplementary material for: Selective hippocampal subfield atrophy mediates cognitive decline in Cushing’s Disease.
Source: Research Square preprint supplement (doi:10.21203/rs.3.rs-7058713/v1), 2025-07-22
Supplement: Supplementary file 1 [file caddb3e3e3513769f4666211.docx]

Supplementary materials

1. Blood Sample Collection, Sequencing, and Data Processing of peripheral blood transcriptome

1.1 Blood Sample Collection

Twenty-five Cushing disease (CD) patients (27.5% of the 91-case CD cohort) and 30 HCs (56.6% of the 53-subject HCs cohort) were enrolled for peripheral blood transcriptomic profiling. Following exclusion of febrile symptoms, acute infections, or recent medication use (within 72 hours), 4–6 mL of antecubital venous blood was collected into ethylenediaminetetraacetic acid (EDTA) -coated tubes. Leukocytes were isolated via gradient centrifugation, stabilized with RNAlater, and stored at −80°C (≤24 months).

1.2 Detailed methods for RNA extraction, quality control, sample preparation, transcriptome sequencing, and upstream analysis

RNA degradation and contamination were monitored on 1% agarose gels. RNA purity was checked using the NanoPhotometer® spectrophotometer (IMPLEN, CA, USA). RNA concentration was measured using Qubit® RNA Assay Kit in Qubit®2.0 Fluorometer (Life Technologies, CA, USA). RNA integrity was assessed using the

RNA Nano 6000 Assay Kit of the Bioanalyzer 2100 system (Agilent Technologies, CA, USA).

A total amount of 1 μg RNA per sample was used as input material for the RNA sample preparations. Sequencing libraries were generated using NEBNext®UltraTM RNA Library Prep Kit for Illumina® (NEB, USA) following the manufacturer’s recommendations, and index codes were added to attribute sequences to

each sample. Briefly, mRNA was purified from total RNA using poly-T oligo-attached magnetic beads. Fragmentation was carried out using divalent cations under elevated temperature in NEBNext First Strand Synthesis Reaction Buffer (5×). First-strand cDNA was synthesized using a random hexamer primer and M-MuLV reverse transcriptase (RNase H-). Second-strand cDNA synthesis was subsequently performed using DNA polymerase I and RNase H. Remaining overhangs were converted into blunt ends via exonuclease/polymerase activities. After adenylation of 3’ ends of DNA fragments, the NEBNext adaptor with hairpin loop structure was ligated to prepare for hybridization. To select cDNA fragments of preferentially 250~300 bp in length, the library fragments were purified with AMPure XP system (Beckman Coulter, Beverly, USA). Then 3 μl USER Enzyme (NEB, USA) was used with size-selected, adaptor-ligated cDNA at 37°C for 15 min followed by 5 min at 95°C before PCR. Then PCR was performed with Phusion High-Fidelity DNA polymerase, Universal PCR primers, and Index (X) Primer. Finally, PCR products were purified (AMPure XP system) and library quality was assessed on the Agilent Bioanalyzer 2100 system.

The clustering of the index-coded samples was performed on a cBot Cluster Generation System using TruSeq PE Cluster Kit v3-cBot-HS (Illumina) according to the manufacturer’s instructions. After cluster generation, the library preparations were sequenced on an Illumina platform and 150 bp paired-end. Use fastp v 0.19.3 to filter the original data, mainly to remove reads with adapters; when the N content in any sequencing reads exceeded 10% of the base number of the reads, the paired reads were removed; when any sequencing reads When the number of low-quality (Q<=20) bases contained in reads exceeds 50% of the bases of the reads, these paired reads were be removed. All subsequent analyses were based on clean reads. The reference genome and its annotation files can be downloaded from <http://ftp.ensembl.org/pub/release-105/fasta/homo_sapiens/dna/Homo_sapiens.GRCh38.dna.primary_assembly.fa.gz> and

<http://ftp.ensembl.org/pub/release-105/gtf/homo_sapiens/Homo_sapiens.GRCh38.105.chr.gtf.gz>. HISAT v2.1.0 and featureCounts 1.6.1 were used to construct the index and to compare clean reads to the reference genome to get the raw count data.

1.3 differential analysis

Raw sequencing data were filtered using criteria: (1) removal of duplicated and sex chromosome-associated genes; (2) exclusion of unannotated genes and novel transcript markers; (3) retention of genes expressed >0.5 counts per million in ≥90% samples, yielding 15,674 high-confidence genes for downstream analysis. Differentially expressed genes (DEGs) were identified from raw read counts (featureCounts v2.0.3) using DESeq2 v1.42.1 and edgeR v3.38.1, with significance thresholds set at |Log2Fold Change| ≥1 and false discovery rate (FDR) -adjusted p <0.05 (Benjamini-Hochberg method).

1.4 Correlation Analysis

Fragments per kilobase million (FPKM) -normalized data were used to assess associations between hippocampal subfield volumes (significantly altered in CD vs. HCs) and DEGs. Spearman correlation analysis was performed in 25 CD patients to evaluate relationships between subfield volumes and DEG expression, with FDR correction (Benjamini-Hochberg method) independently applied per subfield (significance: FDR-adjusted p<0.25).

1.5 Gene Set Enrichment Analysis

Genes showing significant correlations (e.g., left CA4-body volume-associated genes) were used to compute genome-wide Spearman coefficients (n=15,674 genes), generating ranked lists for gene set enrichment analysis (GSEA) via clusterProfiler v4.10.1. Gene Ontology (GO) and Kyoto Encyclopedia of Genes and Genomes (KEGG) gene sets (size: 10–500 genes) were tested using Subramanian's recommended threshold (FDR-adjusted p<0.25). Visualizations were created with ggplot2 v3.5.1.
